# Supplementary material
Source: publisher figshare collection journal article supplement (https://acs.figshare.com/ndownloader/files/18022460)
Supplement: Supplementary file 1 [file 18022460]

## Supporting Information

### Aptamer induced multi-colored AuNCs-WS<sub>2</sub> “Turn on” FRET nano platform for dual-color simultaneous detection of aflatoxin B<sub>1</sub> and zearalenone

Imran Mahmood Khan,<sup>†,‡,||,⊥</sup> Sobia Niazi,<sup>†,‡,||,⊥</sup> Ye yu,<sup>#</sup> Ali Mohsin,<sup>§</sup> Bilal Sajid Mushtaq,<sup>†,‡</sup> Muhammad Waheed Iqbal,<sup>†,‡</sup> Abdur Rehman,<sup>†,‡</sup> Wasim Akhtar,<sup>†,‡</sup> and Zhouping Wang\*,<sup>†,‡,⊥,||</sup>

<sup>†</sup>State Key Laboratory of Food Science and Technology, Jiangnan University, Wuxi, 214122, China

<sup>‡</sup>School of Food Science and Technology, Jiangnan University, Wuxi, 214122, China

<sup>§</sup>East China University of Science and Technology, Shanghai, 200000, China

<sup>⊥</sup>International Joint Laboratory on Food Safety, Jiangnan University, Wuxi, 214122, China

<sup>||</sup>Synergetic Innovation Center of Food Safety and Quality Control of Jiangsu Province, Wuxi 214122, China

<sup>#</sup>Technology Center of Zhangjiagang Entry-Exit Inspection and Quarantine Bureau, Zhangjiagang, 214114, China

## Section 1

### Sample preparation and measurement.

5 g of each grounded maize sample and NaCl was taken into 100 mL flask and extraction solution (CH<sub>3</sub>OH + H<sub>2</sub>O; 7:3 (v: v)) was added in the flask up to the mark. The above mixture was homogenized very well, stirred at 3000 rpm and extracted for 2 min. Subsequently, the supernatant solution was filtered with glass filter. Afterward, 10 ml filtrate was added into 40 mL water and filtered again until clear solution was obtained. The samples were used for standard addition and

21 recovery analysis. The standard solutions of AFB<sub>1</sub> and ZEN were pipetted into the ground maize  
22 specimens before the addition of extracting solution.

23

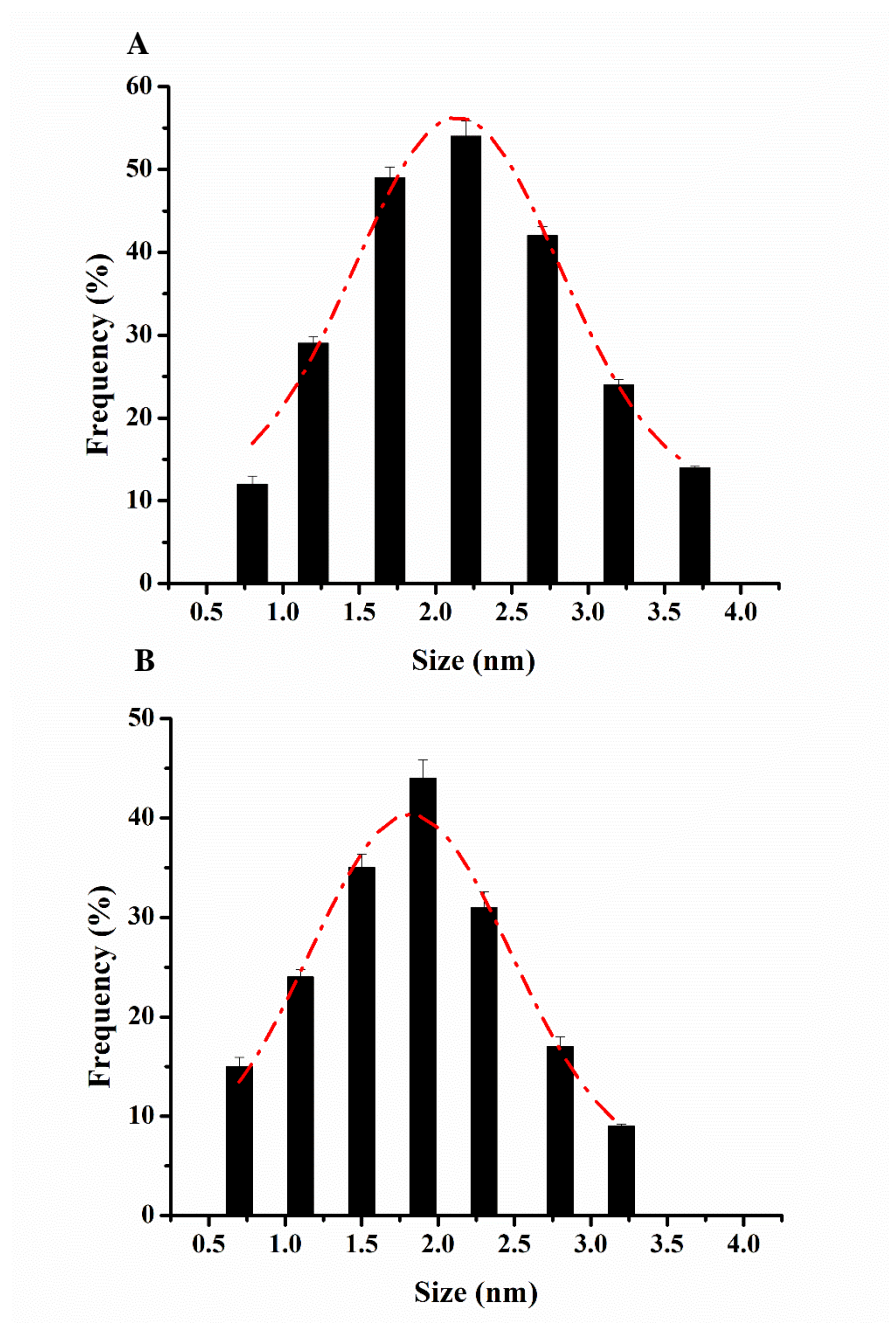

24

25 **Fig. S1.** Size distribution of Lp-AuNCs (A) and BSA-AuNCs (B).

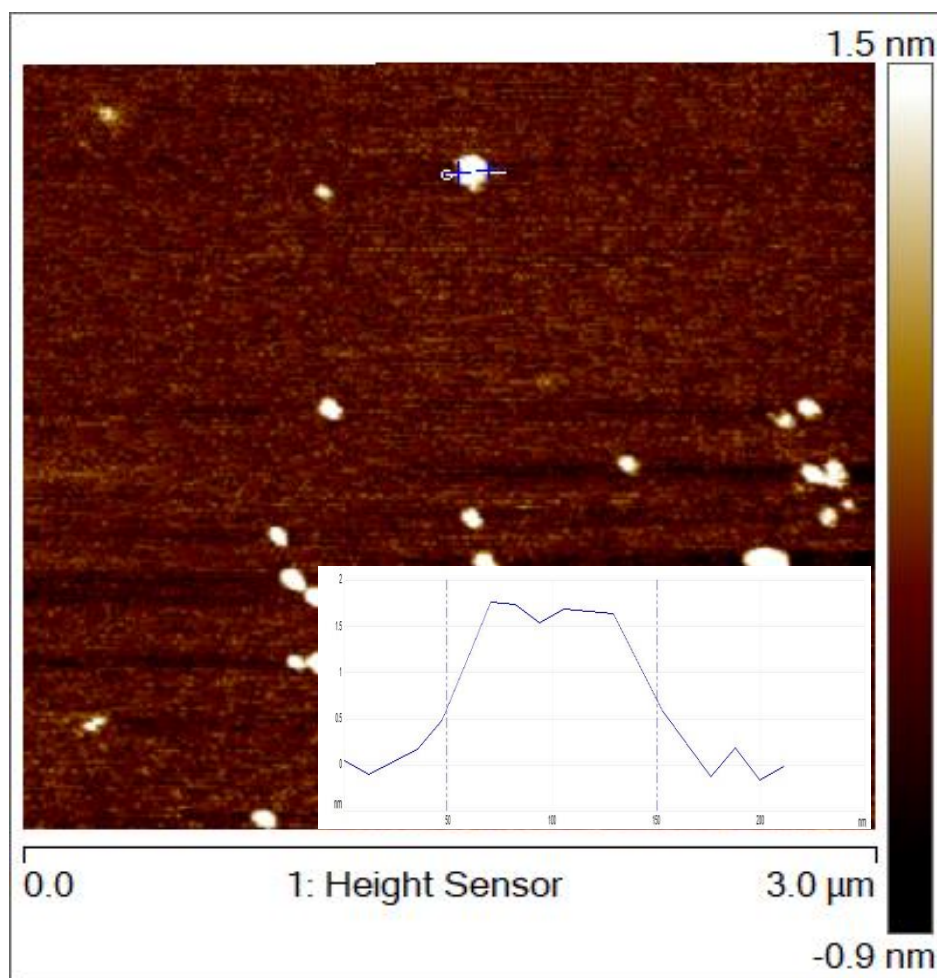

**Fig. S2** AFM of WS<sub>2</sub>

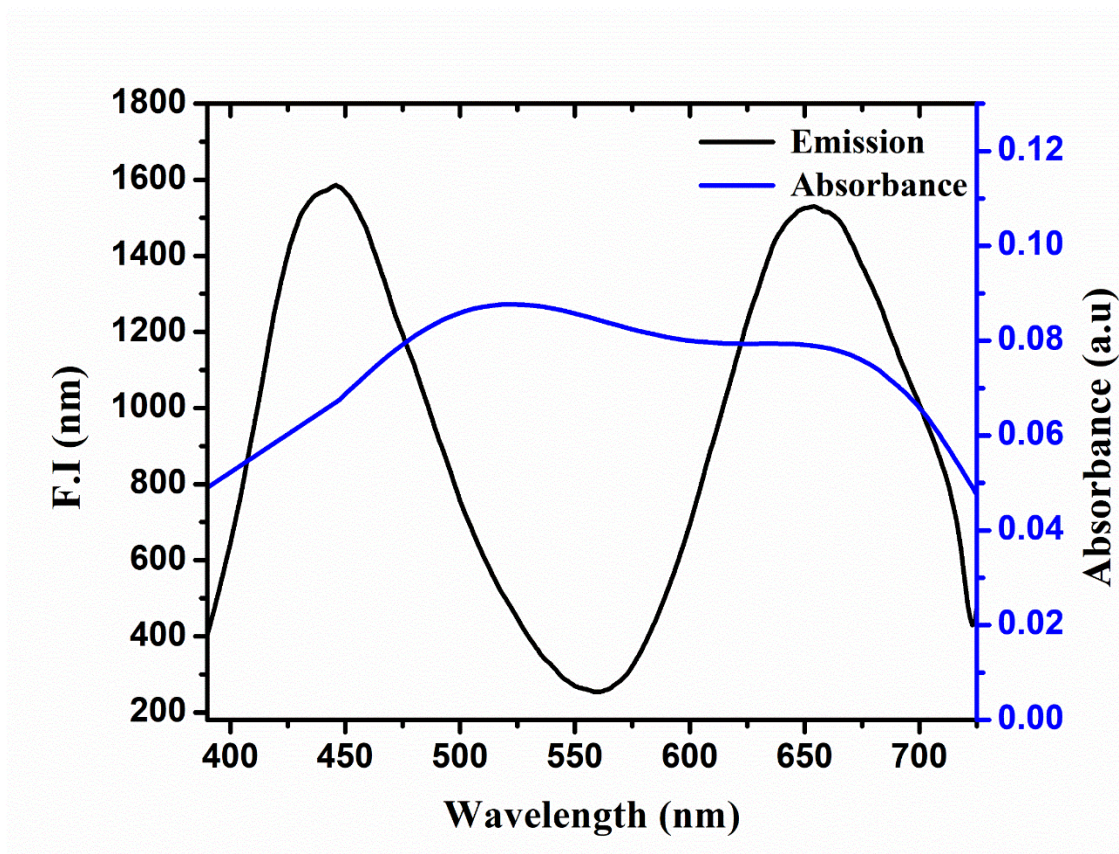

29

30

**Fig. S3.** Overlap between UV-vis spectra of WS<sub>2</sub> and emission spectra of AuNCs



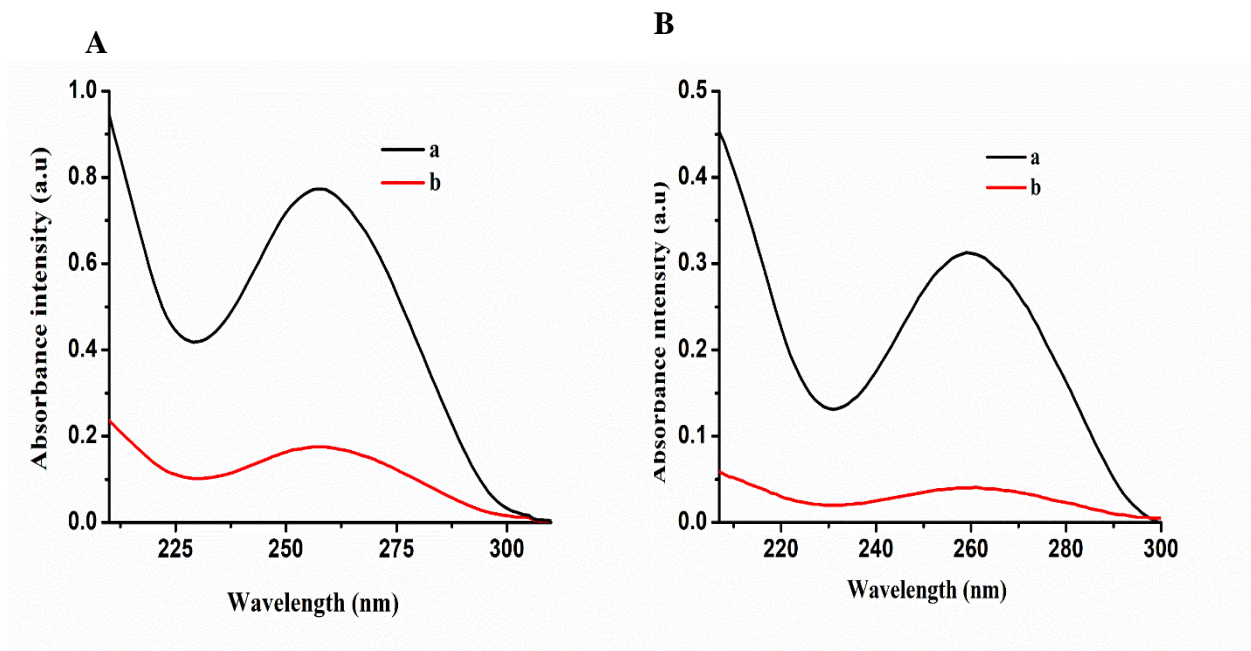

31

32 **Fig. S4** UV-vis spectrum. (A) AFB<sub>1</sub> aptamer (curve a) and AFB<sub>1</sub> aptamer after conjugation with Lp-  
 33 AuNCs in the filtrate solution (curve b, red line). (B) ZEN aptamer (curve a, black line) and ZEN  
 34 aptamer after conjugation with BSA-AuNCs in the filtrate solution (curve b, red line).

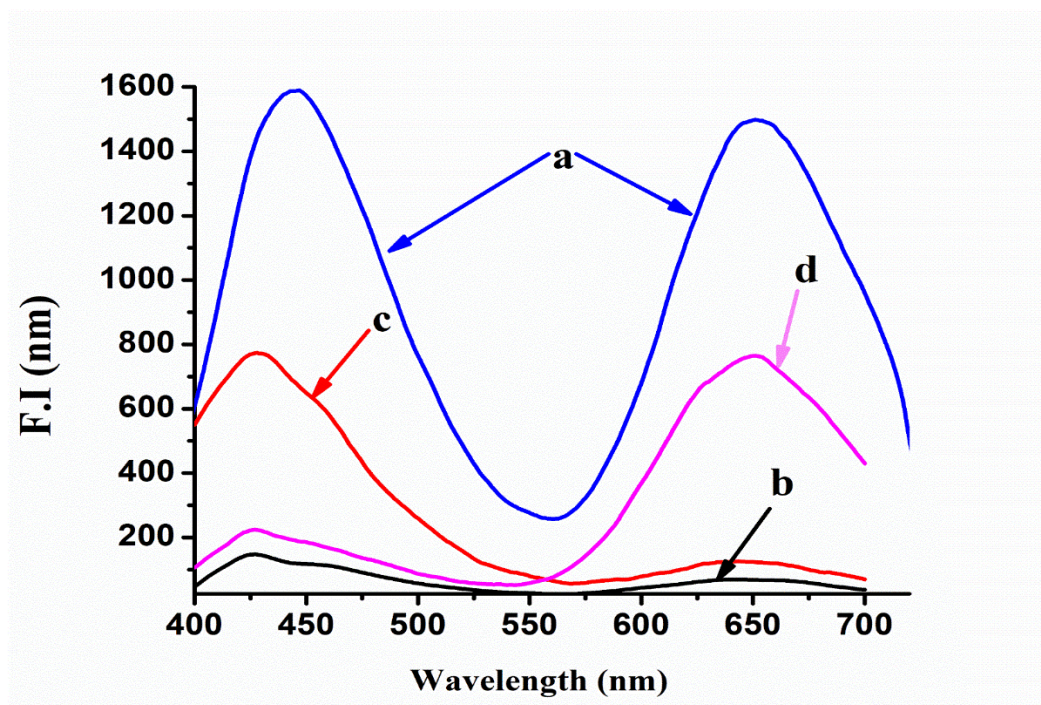

35

36 **Fig. S5** Interference study. (a) Original emission spectra of AuNCs (Aptamer- Lp-AuNCs and BSA-  
 37 AuNCs) (b) Quenched emission spectra of AuNCs with WS<sub>2</sub> (c) AuNCs +WS<sub>2</sub>+ AFB<sub>1</sub> (d) AuNCs  
 38 +WS<sub>2</sub>+ ZEN

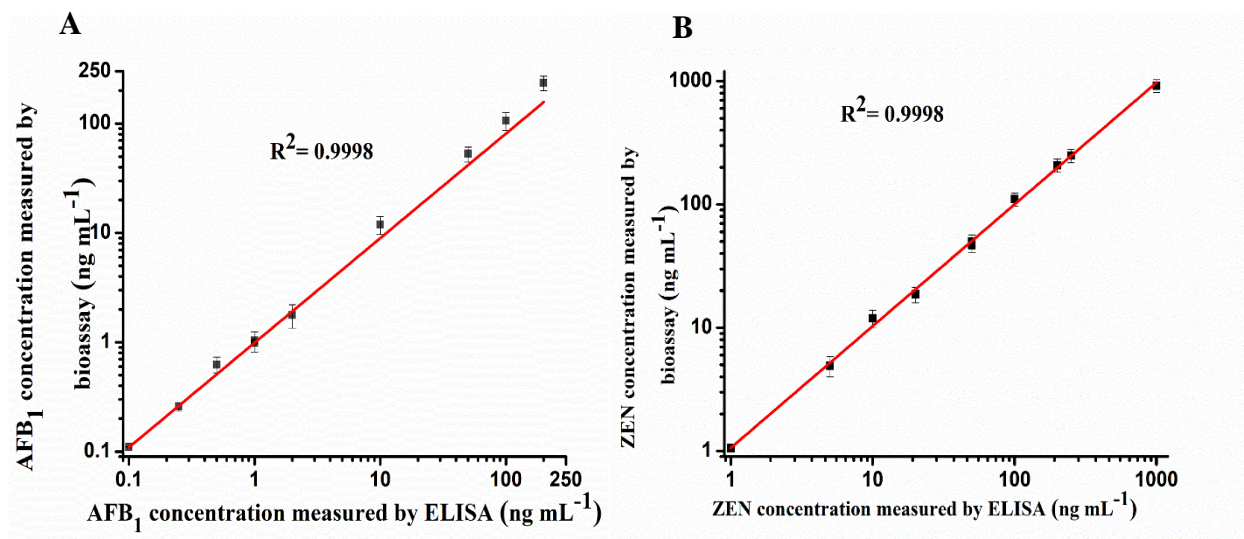

**Fig. S6.** Relationship between developed and standard ELISA method for the detection AFB<sub>1</sub>(A) and ZEN (B).

42 **Table. S1**

43 Recovery results for the added standard AFB<sub>1</sub> and ZEN from maize samples

|         |      | <b>Added</b>                | <b>background</b>           | <b>Detected</b>             | <b>Recovery</b> |
|---------|------|-----------------------------|-----------------------------|-----------------------------|-----------------|
|         |      | <b>concentration</b>        | <b>content</b>              | <b>concentration</b>        | <b>(%)</b>      |
|         |      | <b>(ng mL<sup>-1</sup>)</b> | <b>(ng mL<sup>-1</sup>)</b> | <b>(ng mL<sup>-1</sup>)</b> |                 |
| Maize 1 | AFB1 | 1                           | 0.01 ± 0.001                | 0.99 ± 0.049                | 98              |
|         | ZEN  |                             | 0.04 ± 0.003                | 1.06 ± 0.092                | 102             |
| Maize 2 | AFB1 | 10                          | 0.03 ± 0.002                | 11.9 ± 1.924                | 118.73          |
|         | ZEN  |                             | 0.92 ± 0.088                | 11.96 ± 2.893               | 110.4           |
| Maize 3 | AFB1 | 50                          | 0.09 ± 0.005                | 52.79 ± 7.934               | 105.4           |
|         | ZEN  |                             | 0.03 ± 0.001                | 47.21 ± 9.783               | 94.36           |
| Maize 4 | AFB1 | 100                         | 3.06 ± 0.245                | 106.3 ± 12.79               | 103.19          |
|         | ZEN  |                             | 2.67 ± 0.311                | 110.4 ± 14.06               | 107.73          |
| Maize 5 | AFB1 | 200                         | 2.58 ± 0.392                | 235.5 ± 21.01               | 116.435         |
|         | ZEN  |                             | 4.65 ± 0.413                | 207.8 ± 18.54               | 101.575         |

44
